# Supplementary material for: Untargeted metabolomic and lipid metabolism-related gene expression analyses of the effects and mechanism of aged Liupao tea treatment in HFD-induced obese mice
Source: Royal Society of Chemistry journal article supplement (doi:10.1039/d1ra04438a), 2021-01-01
Supplement: d1ra04438a1.pdf [file d1ra04438a1.pdf]

## **Untargeted Metabolomic and Lipid Metabolism-related Gene Expression Analyses of the Effects and Mechanism of Aged Liupao Tea Treatment in HFD-Induced Obese Mice**

Wenliang Wu,<sup>a</sup> Yao Hu,<sup>d</sup> Shuguang Zhang,<sup>a</sup> Dongming Liu,<sup>c</sup> Qing Li,<sup>b</sup> Yong Lin<sup>\*b</sup> and Zhonghua Liu<sup>\*b</sup>

<sup>a</sup> Tea Research Institute, Hunan Academy of Agricultural Sciences, Changsha, Hunan 410125, PR China

<sup>b</sup> Key Laboratory of Tea Science of Ministry of Education, Hunan Agricultural University, Changsha 410128, PR China

<sup>c</sup> Changsha University of Science & Technology, Changsha 410114, PR China

<sup>d</sup> Nuclear Agronomy and Aerospace Breeding Research Institute, Hunan Academy of Agricultural Sciences, Changsha, Hunan 410125, PR China

\* Correspondence: Yong-lin@hunau.edu.cn (Yong Lin); zhonghua-liu@hunau.edu.cn (Zhonghua Liu).

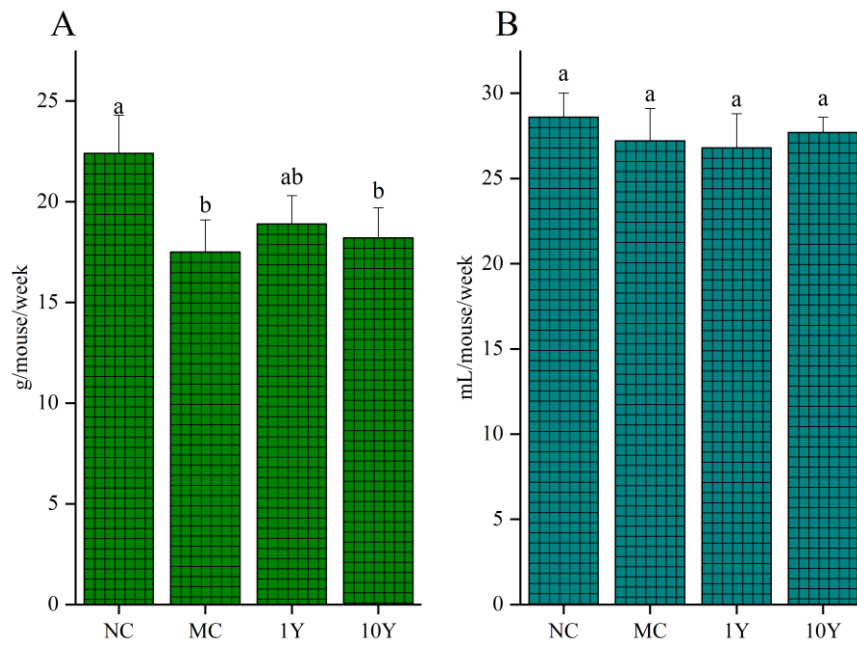

**Figure S1.** Effects of aged LPT on food intake (**A**) and water intake (**B**) in normal and experimental mice. Note: The data represent the mean  $\pm$  SD, n = 10. One-way ANOVA followed by Tukey's multiple comparison were done. Different letters indicate significant differences (P < 0.05) among four groups.
